# Supplementary material
Source: publisher site journal article supplement (https://www.spandidos-publications.com/2798/downloadSupplementary)

Figure S1. Reverse transcription-quantitative PCR analysis of p21 and cyclin D1 transcript levels in mouse tumor tissue derived from xenograft model at 4 weeks post-injection. Data are presented as the mean  $\pm$  SEM (n=3). \*P<0.05. SKA3, spindle and kinetochore associated complex subunit 3; sh, short hairpin.

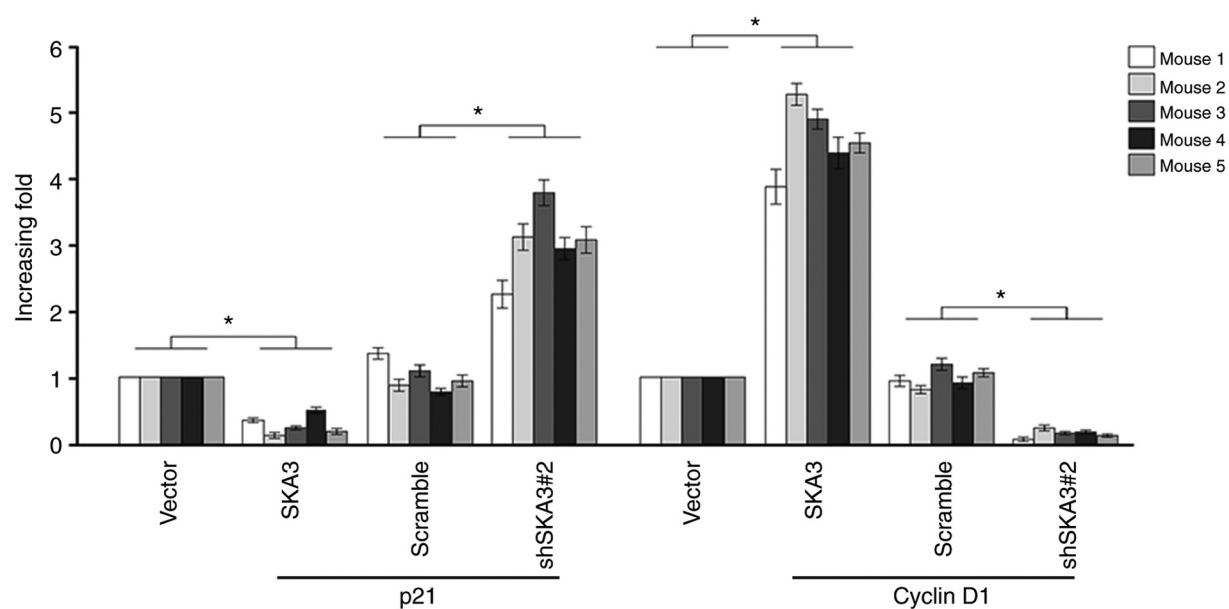

Supplement: Supplementary file 1 [file downloadSupplementary]
